# Supplementary material for: An Identification and Characterization of the Axolotl (Ambystoma mexicanum, Amex) Telomerase Reverse Transcriptase (Amex TERT)
Source: MDPI journal article supplement (doi:10.3390/genes13020373), 2022-02-18
Supplement: s1 [file s1]

**Table S2:** Primer sequences

| Primer                         | Sequence (5' → 3')                                             |
|--------------------------------|----------------------------------------------------------------|
| Amex Tert                      | For: AAATGGTTTGCGCCCGATAGTC<br>Rev: ATAAAGGCATGGTAGCTAAGCCACTG |
| TeloExp                        | For: CCTCAAGCGTTTGTGTGTCA<br>Rev: TGGCTGCTCCATAAGCCTAA         |
| Axolotl ornithin decarboxylase | For: CAGAATATTGGCGTGTCTG<br>Rev: TTCCGTGCAACTTTCATC            |
| Primer TS (Q-TRAP)             | AATCCGTCGAGCAGAGTT                                             |
| Primer ACX (Q-TRAP)            | GCGCGGCTTACCCTTACCCTTACCCTAACC                                 |
| M13                            | For: TGTAACACGACGGCCAGT<br>Rev: CAGGAAACAGCTATGACC             |
