# Supplementary material for: An Identification and Characterization of the Axolotl (Ambystoma mexicanum, Amex) Telomerase Reverse Transcriptase (Amex TERT)
Source: MDPI journal article supplement (doi:10.3390/genes13020373), 2022-02-18
Supplement: s1 [file s1]

**Table S1:** RT-PCR raw data using primer TeloExp and adult limb mRNA respectively limb blastema mRNA. Every sample was applied three times and outliers were eliminated.

| Well | Identifier       | Ct   | Mean Ct |
|------|------------------|------|---------|
| A01  | Blastema 1       | 30.8 | 30.7    |
| A02  | Blastema 1       | 30.6 |         |
| B01  | Blastema 2       | 31.6 | 31.75   |
| B02  | Blastema 2       | 31.9 |         |
| C01  | Blastema 3       | 29.6 | 29.6    |
| C02  | Blastema 3       | 29.6 |         |
| D01  | Blastema 4       | 29.9 | 29.9    |
| D02  | Blastema 4       | 29.8 |         |
| D03  | Blastema 4       | 30   |         |
| E01  | Blastema 5       | 32.3 | 32.05   |
| E03  | Blastema 5       | 31.8 |         |
| F01  | Blastema 6       | 28.4 | 28.57   |
| F02  | Blastema 6       | 28.6 |         |
| F03  | Blastema 6       | 28.7 |         |
| G03  | Limb 1           | 32.9 | 32.9    |
| H03  | Limb 2           | 33.4 | 33.4    |
| A06  | Limb 3           | 31.3 | 31.3    |
| B06  | Limb 4           | 32.7 | 32.7    |
| C05  | Limb 5           | 27.8 | 27.9    |
| C06  | Limb 5           | 28   |         |
| D05  | Limb 6           | 30.3 | 30.4    |
| D06  | Limb 6           | 30.5 |         |
| E05  | Limb 7           | 29.6 | 29.73   |
| E06  | Limb 7           | 30   |         |
| E07  | Limb 7           | 29.6 |         |
| G05  | Negative Control | N/A  |         |
| G06  | Negative Control | N/A  |         |
| G07  | Negative Control | N/A  |         |
| H07  | Blank            | N/A  |         |
