# Supplementary material for: An Identification and Characterization of the Axolotl (Ambystoma mexicanum, Amex) Telomerase Reverse Transcriptase (Amex TERT)
Source: MDPI journal article supplement (doi:10.3390/genes13020373), 2022-02-18
Supplement: s1 [file s1]

[illegible]

|          |                            | + | °   |
|----------|----------------------------|---|-----|
| TERT con | S LRFIPK G                 |   |     |
| AmexTERT | DVAALKQ---NPLISRLRFIPKPNG  |   | 842 |
| hTERT    | EVRQHREARPALITSRLRFIPKPDG  |   | 629 |
| mTERT    | EVRHHQDOWLAMPICRLRFIPKPNG  |   | 619 |
| PmtTERT  | EIEKVQQKKCVPMASKLRFIPKPNG  |   | 845 |
| VtTERT   | EIKTLQQQCKVPLASKLRFIPKPNG  |   | 822 |
| xTERT    | ELENMQQWKNVPLVSRLRFIPKTNG  |   | 684 |
| ZfTERT   | QALKVPN---SAVTSRIIRFIPKTSS |   | 609 |
| OlaTERT  | QVASLPK---GTVISQLRFIPKTDG  |   | 593 |
| TtTERT   | -----SFQIQPQGKLRIIPKGS     |   | 541 |
| AtTERT   | E-----SSRKKLSKFRLFIPKANG   |   | 620 |
| Sc_Est2p | NHNS--YTLNFNFNHSKMRIIPKKS  |   | 446 |
| HIV-1    | EGKISKIGPENPYNTPVFAIKKDS   |   | 223 |
| RT con   | p h hh K                   |   |     |

|          | o                      | +             |     |
|----------|------------------------|---------------|-----|
| TERT con | RPI                    |               |     |
| AmexTERT | LRPIVKVQNVLDVQLHSKEKRD | KMQYFN        | 871 |
| hTERT    | LRPIVNM DYVGARTFRRE--- | KRAERLT       | 655 |
| mTERT    | LRPIVNMSYSMGTRALGRR--- | KQAQHT        | 645 |
| TmtTERT  | LRPIVKVNSVGAKTLNRKSRD  | KKVHYFN       | 874 |
| PvTERT   | LRPVVQKQNGVGAETFSRKAGE | KKIQYFN       | 851 |
| xTERT    | LRPISKISSTLSSQ-QSKENQE | KKIHHFS       | 712 |
| ZfTERT   | MRPITRLSGSR-----       | DTLQYFQ       | 627 |
| OlaTERT  | MRPITRVIGAD-----       | SNTRLHH       | 611 |
| TtTERT   | FRPIMTFLRKDKQKN-----   | IKLNLN        | 562 |
| AtTERT   | VRMVLDFSSSSRSQ-----    |               | 634 |
| Sc_Est2p | FRIIAIPCRGADG---       | EEFTIYKENHKNA | 472 |
| HIV-1 RT | WRKLVDFRELNKRTQDFWEV   | QLGIPHPAG     | 254 |
| RT con   | hr h                   | K             |     |

| TERT con | YFVK DV GAYD IP KL EV                                                                                                                                    | P   |
|----------|----------------------------------------------------------------------------------------------------------------------------------------------------------|-----|
| AmexTERT | KEKQY <sup>Y</sup> FVK <sup>D</sup> VTGAY <sup>D</sup> TIP <sup>H</sup> AKL <sup>E</sup> EV <sup>S</sup> KIL <sup>N</sup> P                              | 952 |
| hTERT    | PPPEL <sup>Y</sup> FVK <sup>D</sup> VTGAY <sup>D</sup> TIP <sup>Q</sup> DR <sup>L</sup> TEVIAS <sup>I</sup> IK <sup>P</sup>                              | 735 |
| mTERT    | QTPRM <sup>Y</sup> FVK <sup>A</sup> VTGAY <sup>D</sup> AI <sup>P</sup> Q <sup>G</sup> KL <sup>E</sup> V <sup>V</sup> AN <sup>M</sup> IR <sup>H</sup>     | 725 |
| TmtTERT  | KIPRF <sup>Y</sup> YVK <sup>A</sup> DVTGAY <sup>D</sup> TIP <sup>H</sup> DK <sup>L</sup> EV <sup>V</sup> SQIL <sup>D</sup> P                             | 955 |
| PvTERT   | VLP <sup>R</sup> F <sup>Y</sup> FVK <sup>A</sup> DVIGAY <sup>D</sup> SIP <sup>H</sup> NKL <sup>E</sup> VEI <sup>L</sup> QAL <sup>S</sup> P               | 932 |
| xTERT    | EKLQ <sup>F</sup> YFVK <sup>T</sup> DVKGAY <sup>D</sup> TIP <sup>H</sup> SKL <sup>E</sup> DEVIS <sup>K</sup> VIN <sup>P</sup>                            | 793 |
| ZfTERT   | SPRPL <sup>Y</sup> FVK <sup>D</sup> VSGAY <sup>D</sup> SLPH <sup>L</sup> KL <sup>E</sup> VEVL <sup>K</sup> EV <sup>L</sup> GP                            | 705 |
| OlaTERT  | KPQPL <sup>Y</sup> FVK <sup>D</sup> VSGAY <sup>D</sup> SLPH <sup>D</sup> KL <sup>E</sup> KEV <sup>I</sup> TEAL <sup>S</sup> P                            | 689 |
| TtTERT   | GRPQL <sup>Y</sup> YV <sup>T</sup> L <sup>D</sup> IKKCY <sup>D</sup> SIDQ <sup>M</sup> KL <sup>L</sup> N <sup>V</sup> FN <sup>F</sup> QSD <sup>L</sup> I | 641 |
| AtTERT   | ELP <sup>L</sup> YFV <sup>A</sup> DVFKAF <sup>D</sup> SV <sup>D</sup> QK <sup>L</sup> LH <sup>V</sup> IQ <sup>S</sup> FL <sup>K</sup> D                  | 714 |
| Sc_Est2p | ALPEL <sup>Y</sup> FMK <sup>F</sup> DV <sup>K</sup> SKCY <sup>D</sup> SIP <sup>R</sup> MECM <sup>R</sup> IL <sup>K</sup> DAL <sup>K</sup> N              | 553 |
| HIV-1 RT | LKKK <sup>S</sup> SV <sup>T</sup> VLDV <sup>G</sup> DY <sup>A</sup> FSV <sup>P</sup> LDED <sup>F</sup> RKY <sup>T</sup> AF <sup>T</sup> IP               | 288 |
| RT con   | h hDh GY h                                                                                                                                               |     |
|          | AF                                                                                                                                                       |     |

| TERT con | K         | V         | D               | M               | F                | LQ          |      |
|----------|-----------|-----------|-----------------|-----------------|------------------|-------------|------|
| AmexTERT | IRKSYKRV  | ATM---    | DDF-----        | LPNTKMFVS       | -----            | HLQON-----  | 1000 |
| hTERT    | VRKAFKSH  | VSTL---   | TDL-----        | QPYMRQFVA       | -----            | HLQET-----  | 783  |
| mTERT    | VHKSFRRQ  | VTTL---   | SDL-----        | QPYMGQFLK       | -----            | HLQSDA----- | 776  |
| TmtTERT  | IRKYYRRH  | VSTF---   | KDF-----        | MSHMLRFVS       | -----            | HLQES-----  | 1005 |
| PvTERT   | IRRYRRHV  | VSTY---   | KEF-----        | ISDMKEFIN       | -----            | HLQEV-----  | 982  |
| xTERT    | IIKSKFRH  | VSEL---   | ADV-----        | LPNMKQFVS       | -----            | NQQEK-----  | 843  |
| ZfTERT   | LRKRFC    | TKAEMS--- | E-----          | PLNMKGFFV       | -----            | DEQVS-----  | 753  |
| OlaTERT  | LKKAFARQ  | VDFS---   | DGSM-----       | GSTSMKGFVM      | -----            | SLQKS-----  | 741  |
| TtTERT   | LQIQQTNN  | INSAMEIEE | EKKINKKPFKMDNIN | FPYYFNLKERQIAYS | SLYDDDDQILQGFKEI |             | 722  |
| AtTERT   | -RSNVVNK  | LVS---    | SDK-----        | NSNFSRFTS       | -----            | TVPVN-----  | 756  |
| Sc Est2p | L-KLFNVVN | -A---     | SRV-----        | P-----          |                  |             | 584  |

| TERT con | L       | VEQ             | L            | F         |             |
|----------|---------|-----------------|--------------|-----------|-------------|
| AmexTERT | -GSLKHA | ILVEQALHLNENSR  | LLQFFQ       | QMITNNIL  | KVGD 1039   |
| hTERT    | -SPLRD  | AVVIEQSSSLNEASS | GLFDVFLR     | FMCCHAV   | IRIG 822    |
| mTERT    | -SALRNV | VIEQISNMNESS    | LLDFDLHFLHRS | VVKIGD    | 815         |
| TmtTERT  | -TSLQNA | IVVEQSLSLNETSS  | LLFAFFLQ     | MIHNNILE  | IEG 1044    |
| PvTERT   | -TSLRNA | VVVEQSVSLKESNT  | SLAEFFLKF    | QISNLIK   | IKD 1021    |
| xTERT    | -NLLRNT | ILVEQNLLNNESS   | VKLLAVFQ     | QIIRSHL   | IRIKD 882   |
| ZfTERT   | -GRLHD  | AAILVER-HSSEVR  | GDVDFQ       | FKMLCSYV  | IHYDQ 791   |
| OlaTERT  | -SKVHH  | AVLVEQAFGSNLR   | KKDALQFF     | TQMLTGSV  | VQHKG 780   |
| TtTERT   | QSDRD   | PFPIVNDKQKPRC   | ITDKIITHNHL  | KNMLKSN   | VNISFNK 762 |
| AtTERT   | ---     | ALQISVVDKGNHVR  | KDKLMVMW     | IGNMLKNN  | LQDK 793    |
| Sc Est2p | ---     | KPYELYIDNVRTV   | HLNSQDVINV   | VEMEIFKTA | LWVED 621   |

### Motif B'

|          |      | * |   | + | ° |   | + | + | + |                           |
|----------|------|---|---|---|---|---|---|---|---|---------------------------|
| TERT con | Y    | Q | G | I | P | G | S | I | S | LCY G ME                  |
| AmexTERT | KCFV | Q | C | R | G | I | P | G | S | ILSTVLCSLCYGD MENNFSGI    |
| hTERT    | KSYV | Q | C | Q | G | I | P | G | S | ILSTLLCSLCYGD MENKLFAGI   |
| mTERT    | RCYT | Q | C | Q | G | I | P | G | S | SLSTLLCSLCFGD MENKLF AEV  |
| TmtTERT  | RYYL | Q | C | Q | G | I | P | G | S | ILSTLLCSLCYGD MENKLF CGI  |
| PvTERT   | RYVY | Q | R | C | G | I | P | G | S | ILSTLLCNLCYGD MENKLLQGV   |
| xTERT    | RYYM | Q | C | Q | G | I | P | G | S | MLSTILCSLCYGD MENAMLGGI   |
| ZfTERT   | QMFR | Q | V | C | G | I | P | G | S | SVSSLLCNLCYGHMEKALLKDI    |
| OlaTERT  | KTYR | Q | C | R | G | I | P | G | S | VVSSLLCCLCYGHMENVLFRDI    |
| TtTERT   | VKFR | Q | K | R | G | I | P | G | S | GLNISGVLC SFYFGKLEEEYTQFL |
| AtTERT   | SFYV | Q | I | A | G | I | P | G | S | HRLLSLLCCFYFYGHLERTLIYPF  |
| Sc_Est2p | KCYI | R | E | D | G | L | F | Q | S | SLSAPIVDLVYDDLLEF-YSEF    |
| HIV-1 RT | GIRY | Q | Y | N | V | L | P | G | S | WKGSPAIFQSSMTKILEPFRKQN   |
| RT con   |      |   |   |   | h | P | Q | G |   | pP hh h                   |

### Motif C

|          |       |    | +  | °  | °  | +        |      |
|----------|-------|----|----|----|----|----------|------|
| TERT con | L     | RL | DD | FL | L  | TP       |      |
| AmexTERT | FMRLI | DD | FL | LV | TP | PYL DK   | 1096 |
| hTERT    | LLRLV | DD | FL | LV | TP | PHL TH   | 879  |
| mTERT    | LLRFV | DD | FL | LV | TP | PHL DQ   | 872  |
| TmtTERT  | LIRLI | DD | FL | LV | TP | PHL TL   | 1101 |
| PvTERT   | LMRLT | DD | FL | LV | TP | PHL TQ   | 1078 |
| xTERT    | LMRLI | DD | FL | LV | TP | PHL DQ   | 939  |
| ZfTERT   | LMRLI | DD | FL | LV | TP | PHL SK   | 848  |
| OlaTERT  | LMRLV | DD | FL | LV | TP | DRN Q    | 837  |
| TtTERT   | LMRLT | DD | Y  | L  | F  | ISDSQ QN | 826  |
| AtTERT   | LLRFT | DD | Y  | L  | F  | VSTSRDQ  | 871  |
| Sc_Est2p | ILKLA | DD | FL | I  | I  | STD RQ Q | 681  |
| HIV-1 RT | IYQYM | DD | Y  | L  | V  | SGDLEIG  | 350  |
| RT con   |       |    | h  | F  | DD | hhh      |      |
|          |       |    |    | Y  |    |          |      |

### Motif D

|          |         |     |   |   |   |    |   |   |                |
|----------|---------|-----|---|---|---|----|---|---|----------------|
| TERT con | A       | FL  | L | G | P | YG | N | K |                |
| AmexTERT | AETFLRT | LA  | E | G | I | P  | Q | Y | GCSISLSKTMV    |
| hTERT    | AKTFLRT | LV  | R | G | V | P  | E | Y | GCVVNL RKT VV  |
| mTERT    | AKTFLST | LV  | H | G | V | P  | E | Y | GCMINL QKT VV  |
| TmtTERT  | AKTFLRT | LA  | G | I | P | E  | Y | G | FLINPKK TMM    |
| PvTERT   | AKMFLRT | LA  | M | G | V | P  | E | Y | GFVINP AKTVV   |
| xTERT    | AKTFLRT | LA  | E | G | I | P  | Q | Y | GCSISL PQT VV  |
| ZfTERT   | ATEFLT  | LL  | S | G | V | P  | D | Y | GCQINP QKVAV   |
| OlaTERT  | AQSFLS  | ILL | A | G | V | P  | Q | Y | GVVANP QKV VV  |
| TtTERT   | ALNLIV  | Q   | L | Q | N | C  | A | N | NGFMFNDQ KIT T |
| AtTERT   | ASSFYH  | R   | L | K | H | G  | F | K | DYNCFMNETK FCI |
| Sc_Est2p | VINIKK  | L   | A | M | G | G  | F | Q | KYNAKANRD KILA |
| HIV-1 RT | HRTKIE  | E   | L | R | Q | H  | L | L | WGLTTPDKKHQK   |
| RT con   |         |     |   |   |   | G  | h |   | cK h           |

### Motif E

|          |       |   | + | ° | + |     |
|----------|-------|---|---|---|---|-----|
| TERT con | P     | W | C | G | L | L   |
| AmexTERT | RSVFP | W | C | G | V | L F |
| hTERT    | HGLFP | W | C | G | L | L L |
| mTERT    | HCLFP | W | C | G | L | L L |
| TmtTERT  | CGVIP | W | C | G | L | L L |
| PvTERT   | HGVIP | W | C | G | L | L I |
| xTERT    | HCLFR | W | C | G | L | L L |
| ZfTERT   | SCLFP | W | C | G | L | M I |
| OlaTERT  | HCLFP | W | C | G | L | L L |
| TtTERT   | QNECQ | W | I | G | K | S I |
| AtTERT   | VPFVR | W | T | G | L | L I |
| Sc_Est2p | DTVIQ | F | C | A | M | H I |
| HIV-1 RT | EPPFL | W | M | G | Y | E L |
| RT con   |       |   | L | G |   | h   |
|          |       |   |   |   |   |     |

### CTE

|          |      |      | *    |      | *    |       | *    | *     |     |
|----------|------|------|------|------|------|-------|------|-------|-----|
| TERT con | DTQT | LEVY | DYSS | YA   | TSIR | SLTF  | S    | AG    | MR  |
| AmexTERT | DTQT | LEVY | C    | DYSS | YACT | SIRSS | LT   | ISHKA | ETG |
| hTERT    | DTRT | LEVY | C    | DYSS | YART | SIRAS | LT   | FN    | R   |
| mTERT    | DTQT | LEVY | C    | DYSS | YACT | SIKTS | SLTF | Q     | S   |
| TmtTERT  | DIQT | LEVY | C    | DYSS | YACT | SIRSS | LA   | FN    | S   |
| PvTERT   | DTQT | LEVY | C    | DYSS | YACT | SIRSS | LS   | FN    | S   |
| xTERT    | DTQT | LDVY | C    | DYSS | YACT | SIRSS | MT   | FC    | S   |
| ZfTERT   | HFHT | LDVY | C    | DYSS | YACT | SLRYS | LT   | LS    | A   |
| OlaTERT  | DTRS | LDVY | C    | DYSS | YAGL | SLRYS | LT   | LS    | A   |

|          |      |     |       |       |   |   |   |   |   |      |   |   |   |   |   |   |   |     |   |     |
|----------|------|-----|-------|-------|---|---|---|---|---|------|---|---|---|---|---|---|---|-----|---|-----|
| TERT con | ININ | YNI | LLQAY | R     | F | H | A | C | V | QLPF | G | V | K | N | P | F | L | ISD | A | CCY |
| AmexTERT | FINI | YNI | LLQAY | R     | F | H | A | C | V | QLPF | N | G | V | R | K | N | P | S   | F | L   |
| hTERT    | CTNI | YNI | LLQAY | R     | F | H | A | C | V | QLPF | H | Q | V | W | K | N | P | T   | F | L   |
| mTERT    | CINI | YNI | LLQAY | R     | F | H | A | C | V | QLPF | D | Q | V | R | K | N | P | T   | F | L   |
| TmtTERT  | FINI | YNI | LLQAY | R     | F | H | A | C | V | QLPF | N | Q | V | R | K | N | P | C   | F | L   |
| PvTERT   | CINI | YNI | LLQAY | R     | F | H | A | C | V | QLPF | N | Q | K | I | K | S | N | P   | R | F   |
| xTERT    | CINT | YNI | LLQAY | R     | F | H | A | C | V | QLPF | G | Q | V | M | N | P | P | F   | L | T   |
| ZfTERT   | YRS  | L   | YNI   | LLQAL | R | F | H | A | C | V    | R | S | L | P | L | G | S | V   | N | R   |
| OlaTERT  | YKNI | H   | LV    | LLQAC | R | F | H | V | C | V    | Q | S | L | P | F | A | T | V   | A | K   |

|          |       |    | * |    | *   |     |
|----------|-------|----|---|----|-----|-----|
| TERT con | LK    | KN | G | LG | EAV | QWL |
| AmexTERT | ILKSK | N  | I | G  | I   | A   |
| hTERT    | ILKAK | N  | A | G  | S   | L   |
| mTERT    | ILKVK | N  | P | G  | M   | T   |
| TmtTERT  | ILKTK | N  | T | G  | I   | A   |
| PvTERT   | VLKTK | N  | K | D  | V   | S   |
| xTERT    | TFKAK | N  | K | D  | L   | T   |
| ZfTERT   | LLTHI | N  | K | G  | L   | P   |
| OlaTERT  | LIRRS | N  | T | G  | L   | V   |

|          |       | * |   | * |   |
|----------|-------|---|---|---|---|
| TERT con | L     | R | L | T | L |
| AmexTERT | QLSK  | I | H | K | A |
| hTERT    | QLSR  | K | L | P | G |
| mTERT    | LLCR  | K | L | P | E |
| TmtTERT  | QLFK  | K | I | P | K |
| PvTERT   | RLLR  | Q | I | P | E |
| xTERT    | QLSR  | R | L | S | Q |
| ZfTERT   | ALQRE | L | C | G | I |
| OlaTERT  | RLER  | L | G | D | L |

**Figure S2.** Comparison of different TERT motifs of representative species using MSA: Conserved amino acid residues are colored, similar amino acid residues are highlighted in yellow. Consensus sequence is shown at the highest row, RT consensus [35] is shown at the lowest row. Residues that have been shown to be essential for enzyme activity [36] are indicated by open circles (o), telomerase-specific signatures [34] are indicated by plus (+). Amino acid residues deviate from TERT consensus are marked by asterisk (\*).

MSA of conserved regions among vertebrate TERTs of the N-terminal half (v-I to v-IV) [40].

MSA of RT motifs, motif T and the IFD. Motif T and the IFD are TERT-specific so that the alignment was performed without HIV-1 RT. Hydrophobic conserved residues in the IFD are highlighted in blue and charged/hydrophilic positions are highlighted in pink [37].

MSA of CTE. CTE-like regions are found in RTs and in TERTs, but significant sequence-similarities are conserved within vertebrate TERTs only.
