# Supplementary material for: An Identification and Characterization of the Axolotl (Ambystoma mexicanum, Amex) Telomerase Reverse Transcriptase (Amex TERT)
Source: MDPI journal article supplement (doi:10.3390/genes13020373), 2022-02-18
Supplement: s1 [file s1]

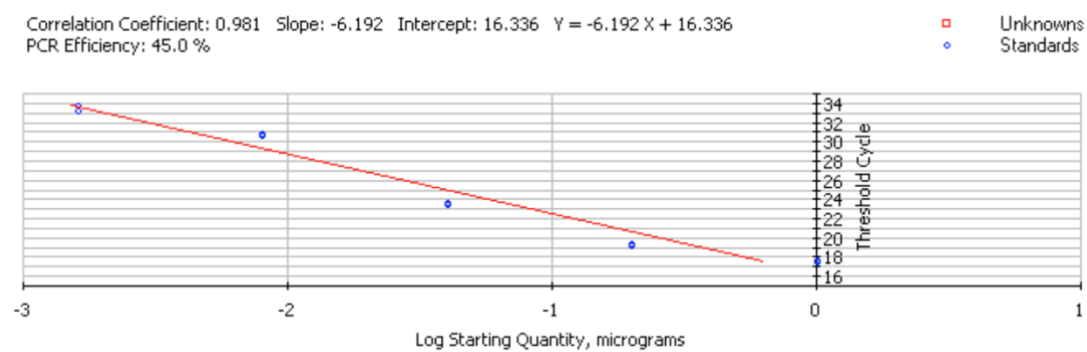

**Figure S3.** Determination of the standard curve and linear relationship for Q-TRAP. The Ct-values of the standard control were plotted against log[protein] to calculate the linear equation. The Y-intercept and the slope values from the equation are used to quantify the RTA of unknown samples ( $10^{[(Ct \text{ sample} - Y\text{-Int})/slope]}$ ).
