# Supplementary material for: An Identification and Characterization of the Axolotl (Ambystoma mexicanum, Amex) Telomerase Reverse Transcriptase (Amex TERT)
Source: MDPI journal article supplement (doi:10.3390/genes13020373), 2022-02-18
Supplement: s1 [file s1]

|          |                                                               |     |
|----------|---------------------------------------------------------------|-----|
| AmexTERT | ---MQRGNDFAGVLRLLRSVYPQ-----VCTLIQFM-----PTFPV---VH           | 35  |
| hTERT    | ---MPRAPRCRAVRSLLRSHYRE-----VLPLATFV-----RRLG-----P           | 33  |
| mTERT    | ---MTRAPRCPAVRSLLRSRYRE-----VWPLATFV-----RRLG-----P           | 33  |
| TmtTERT  | ---MAGSGPFRAVLAMLEGCYAE-----VLGLEQFV-----QRLREAAACGP          | 39  |
| PvTERT   | ---MGRPRRWRAVQGLLRSCYAE-----VLPLEAFV-----ERLQGQAQAE           | 39  |
| xTERT    | ---MPLRTGGATLLSILQRLYGQ-----VLGIVEYT-----DTLQVP---GG          | 36  |
| ZfTERT   | MSGQYSTDGGFRPVLEILRSLYPV-----VQTLEEF-----DGLQFP---DG          | 40  |
| OlaTERT  | ---MTSGDLSSVLNILRSLYKR-----TRTLEEFA-----DGVVFR---EG           | 35  |
| TtTERT   | -----                                                         | 0   |
| AtTERT   | ---MPRKPRHRVP-EILWRLFGNRARNLNDIAVDLIPNRNIQPEQCRCRGQGCLGCSSD   | 55  |
| Sc_Est2p | -----                                                         | 0   |
| AmexTERT | GSATIQRSDDGEHYRTFVSQLLVCIPGEAWPPPHSAKIQQLSSQREVVARVIQRICEK-Q  | 94  |
| hTERT    | QGWRLVQRGDPAAFRALVAQCVCVPWDARPPPAAPSFQVSCLELVARVLQRLCER-G     | 92  |
| mTERT    | EGRRLVQPGDPKIYRTLVAQCVCVPMHWGSGQPPADLSFHQVSSLELVARVQRLCER-N   | 92  |
| TmtTERT  | GEAELLQRGDSELYQTFVSCVVCVPRGARAIQPLSFQQLSSESEVVIRVIQRLCEK-K    | 98  |
| PvTERT   | PLVPLVQEGDPACYRHLVERCLVGRAPGCKALPSRVVFQVSSLNDVVARVIQRICEK-K   | 98  |
| xTERT    | IKVPVLLEGDSEKFRSFVAELVVCIPRGTKPLSPVSVFLQLSTQREVVARVIQRICEK-K  | 95  |
| ZfTERT   | RKPVILLEETDGAREFKLLSGLIVCAYTPPQ-LR---VPAQLSTLPEVLAFTLNHIKRR-K | 95  |
| OlaTERT  | RRAALLQPSDTHSEKSFVRGVFVCSDEELQDVP---SCNQCTCFPELLAFILNSLKRK-R  | 91  |
| TtTERT   | -----MQKINNINN                                                | 9   |
| AtTERT   | KPAFLLRSDDPHYRKLHRCFVVLHEQTPPL-LDFSPTSWWSQREIVERIIEMMQSGCD    | 114 |
| Sc_Est2p | -----                                                         | 0   |
| AmexTERT | RSNVLAFGFALVDEN---SPM-PLTFAPNICNFLPNPTTATISTSVLWGTLLSRIGDDIM  | 150 |
| hTERT    | AKNVLAFGFALDGA---RGGPPEAFTTSVRSYLPNTVTDALRGSGAWGLLLRRVGDDVL   | 149 |
| mTERT    | ERNVLAFGFELNEA---RGGPPMAFTSSVRSYLPNTVIETLRVSGAWMLLLSRVGDDLL   | 149 |
| TmtTERT  | KKNVLAFGYTLLEN---SSYSQVMSTSNICSYLPNTATETLRMSVLWETLLSRIGDDVM   | 155 |
| PvTERT   | KKNLLASGYSLNEN---NYQ--LSCMPNIYTYLPNNTTETIRQSILWEIILSRVGDDVM   | 153 |
| xTERT    | KKNVLAFGYGLVDEK---NSL-NIRLTPNICNYFPNPTTTTISTSVLWETLLTRVGDDVM  | 151 |
| ZfTERT   | LRNVLGFGYQCSQDVT---TSSDPFRFHGDV-----SQTAASISTSEVWKRINQRLGTEVT | 147 |
| OlaTERT  | RNVLAHGYNFLGVAQEDRDADHERFQGDV-----SQSAAYIHSDDLWKKVTARLGTDTV   | 146 |
| TtTERT   | NKQMLTRKEDLLTVL---KQISALKYVS-----NLYEFLLAT-----               | 43  |
| AtTERT   | CQNVICARYDKYDQ-----SSPILELLTSSSWEFLLRKRVGHDM                  | 153 |
| Sc_Est2p | -----                                                         | 0   |
| AmexTERT | MYLLEHCSLFMLVPPTCCYQICGLPVYKLLN-NVCRSPAWSTRQIGSRQRGNILLMYIQKK | 209 |
| hTERT    | VHLLARCALFVLVAPSCAYQVCGPPLYQLGAATQARPPPHASG---PRRRLGCE-----   | 200 |
| mTERT    | VYLLAHCALYLLVPPSCAYQVCGSPYQICATTDIWPVSASYSR---PTRPVGRNFTNLR   | 206 |
| TmtTERT  | MYLLEHCAIFMLVPPSCSYQICGQPVYELTSSNAAPSAVFKQRYSKSRHNILFDYVRKK   | 215 |
| PvTERT   | MYLLEHCAIFMLVPPSCCYQMCQPIYELALRNATLSSAFFRQRYPGPTRSALSGLYQKR   | 213 |
| xTERT    | MYWLEQCSIFVFPVPPRCYQITGQPIYTLPSDDV-----FLFQSQSFTQSNVLLRYIKRN  | 206 |
| ZfTERT   | RYLLQDCAVFTTVPPSCVLQVCGEPVYDLLMPR-SWSGFFLSNSDNERISGAMRKFPVQ   | 206 |
| OlaTERT  | RYLLGSCSVFLAPPSCIFQICGVPAYDRVSMTTASSGFLLRPPSRKHKS-----        | 196 |
| TtTERT   | -----EK-----                                                  | 45  |
| AtTERT   | VYLLQQTSTIFLPLLGKKHQVSGPPLCIKHKRTLSVH-----ENKRKR-----         | 196 |
| Sc_Est2p | -----MKILFEFIQDK                                              | 11  |
| AmexTERT | --FHQHKRYLEKATFWKAKRRLQANSSVFSVQRSSQTQHCT-GNCQNGKTQLVLVEPHPS  | 266 |
| hTERT    | ---R-----AW-----NHSVREAG-----VPLGLPAPGAR--                    | 222 |
| mTERT    | -FLQQ-----IK-----SSSRQEAP-----KPLALPSRGTK--                   | 231 |
| TmtTERT  | --FQLSKTN-----RWKWKPRSEINILNTKSQRNKTQGSV-PDYEHSATAKGAVGQN--   | 265 |
| PvTERT   | --LKSCGKF-----LATANRKKGNRSRSQSRKIQKGLECDCLSPMGYEVHGLKPA       | 262 |
| xTERT    | -VFHLRKKYLKPKHSM-----TSRMLTW--RRNK-----SPSGLLIRS---           | 241 |
| ZfTERT   | KTVAISKK-----RTRDN-----EKYIS-----                             | 224 |
| OlaTERT  | --FQVGKK-----RRSANLTRGSGVDVEES-----                           | 220 |
| TtTERT   | -----                                                         | 45  |
| AtTERT   | -----DDNVQPPTKRQWLSSAV-----DD---CPKDDSATITPIVGEDV-            | 232 |
| Sc_Est2p | LDID-----LQTNST-----                                          | 21  |
| AmexTERT | PGKSHAMQQHVTDNHL-----KRKST--LRPATTHENEDEAGVPAKMRMRDFIGTQA     | 316 |
| hTERT    | ---RRG---GSASRSLPLPKRPRRGAAPEPERTPVG-----QG                   | 254 |
| mTERT    | ---RHL---SLTSTSVPSAKKARCYPVPRVEEGPHR-----QV                   | 263 |
| TmtTERT  | -SKTNKQV-RMATGHLENRRGNLYPVAT--TTPSKRKLDRDQFEVTAKRMIKINLREED   | 321 |
| PvTERT   | KSKPFAGM-SICRESV--QRSDQC--TSL--TAPLLKRKWTGQCGTSAKRVKIMQTEEEL  | 315 |
| xTERT    | --KT--SM-AVTT-EI-----HSKRKLCSKDICIPIPKRRRDNLDKDDT             | 279 |
| ZfTERT   | -VKRRRVKETVNNNN--GNYRSLCFAI-----SKKRAIDNEENISLKRMRMEETDQVA    | 274 |
| OlaTERT  | -RKRRRVESGVA-----RKRKREPEEEESRERRRGVHHE---                    | 254 |
| TtTERT   | -----IVQTSEL-----DTQFQEFLLTTTIIA--SEQN                        | 70  |
| AtTERT   | -----DQHREKKTTKRSRIYLKRRRKQRKVNFK                             | 260 |
| Sc_Est2p | -----                                                         | 21  |

|          |                                                               |     |
|----------|---------------------------------------------------------------|-----|
| AmexTERT | Q---SFCSLVNKSVPN-LKTICDR-----CGWKSMDLATPTEIQAVKPDVG           | 359 |
| hTERT    | SWA-----HPG-RT---RG-----PSDRGFCV-VSPARPA-----E--              | 280 |
| mTERT    | LP-----T-----PSGKSW-V-PSPARSP-----EVP                         | 283 |
| TmtTERT  | AW---NLGSNVDKNKFT-LDIIYDTQ-SLSFVESFSVNNFIKIKSISQENEGTAETPDAP  | 376 |
| PvTERT   | EKEMRNLVPTKSKNIVM-LDDGGDGSTSKRCARLCTEDGLIVKSVQSPECGAQMSNP     | 374 |
| xTERT    | V-----DHFD-LP-----MCGSVSYLSNMY-----PKTN                       | 302 |
| ZfTERT   | KIR-----NENHES-----                                           | 283 |
| OlaTERT  | --E-----RRQHEA-----V-----                                     | 262 |
| TtTERT   | L--VENYKQKYNQPNFSQLT-----                                     | 88  |
| AtTERT   | K-----VDCNAPC-IT-----PSTN                                     | 274 |
| Sc_Est2p | -----YKENLKCGHFNGLDEI-----LTTCFALPNSRKIALPCLP                 | 56  |
| AmexTERT | SRLQNKVD---IPVCEDSLS-PASPFEANR-----RET-----HVVEENS-----EKF    | 398 |
| hTERT    | -----EATS-LE-----GAL-----                                     | 289 |
| mTERT    | T-----AEKDLS-SK-----GKV-----                                  | 295 |
| TmtTERT  | SLVQEVQDSKEKSVTDDENS-LRLRVQCNKLYKSSTET-K-----TNS-----SR-      | 419 |
| PvTERT   | YAVPDNQE-----SFLCDKILTLDNES-E---TLCELNS-----RR-               | 406 |
| xTERT    | VQVT-----GLITSGYK-KTKTFQCQKPVSCQKK-T-----TAF                  | 335 |
| ZfTERT   | -----QSFAIS-----KKR-A---RDNEENI-----SL-                       | 302 |
| OlaTERT  | -----LDESTLS-----GKS-G-----ENDA-----A--                       | 278 |
| TtTERT   | -----IKQVIDDSIILLGNKQNY--VQQIGTTTIGFYVEYENINLSRQTLYSSNF       | 136 |
| AtTERT   | GKVSTGN-----D-----EMNL-----HI-                                | 288 |
| Sc_Est2p | GDLSHKAV-----IDHCIIYLLTGELYNNVLTFGYKI-A---RNEDVNN-----SLF     | 99  |
| AmexTERT | GNVLHLPKI-----RNNVTT--ECITLQEKAYSVKCKKDQLFREEIKEA---KNNW-     | 444 |
| hTERT    | -S-----GT-----R-----HSHPSVGRQHAG-----                         | 306 |
| mTERT    | -S-----DL-----S-----LS-GSVCCCHKPS-----                        | 311 |
| TmtTERT  | -----E-----GVELDICKFQVGSVQMKA---EDTFL                         | 444 |
| PvTERT   | ESSTRQPKL-----R-----TGDSDVCFGQPL-----GTEM                     | 432 |
| xTERT    | YS-----V-----AGD---CNL-----SLKDN---VNKL-                      | 353 |
| ZfTERT   | ---KRQRM-----E-----EIDQVAKIRNE-----                           | 319 |
| OlaTERT  | -----AV-----K-----PPPETSAAAPP-----                            | 292 |
| TtTERT   | RNLLNIFGEEDFKYFLIDFLVFTKVEQNG---YLQVAGVCLNQYFSVQVKQKKWKYKNNFN | 193 |
| AtTERT   | -----GI-----N-----GS-----LTDF-                                | 297 |
| Sc_Est2p | CHSA---NV-----NVTLLKGAAWKMFHSLVGTYAFVDLLINYTVIQFN---GQFFT     | 145 |
| AmexTERT | ----QEAKPTK---SVSK-Q-----PTQILPSN---IIIERGYLLYS-NFSFR-----    | 480 |
| hTERT    | -----PPS---TSRPPR-----PWDTPCPP---VYAETKHFLYS-SGDK-----        | 338 |
| mTERT    | -----STS---LLSPPR-----QNAF-QLR---PFIETRHFLYS-RGDGQ-----       | 343 |
| TmtTERT  | KYRGLKCPPTN---IAKKL-----SNKISRSR---VYIGRKGLYS-SRSFR-----      | 484 |
| PvTERT   | TSGGRGCKTRV---SKSVQN-----SDRSSVPV---TYIERRFLLYC-HRQLK-----    | 473 |
| xTERT    | -----ITN---ASVPTA-----QRSLFSN---IFIDFGRTLILY-SISYK-----       | 386 |
| ZfTERT   | NHGSQS-----WKPAD-----QRPPRSQ---CSIRVLSMLYN-GRGM-----          | 353 |
| OlaTERT  | LEGGPS-----WRSGA-----FPPLPSSQ---CFIRTLGFLYG-GRGM-----         | 326 |
| TtTERT   | MNGKATSNNNQ-----N---NANLSNEKKQENQYIYPEIQRSQIFYCNHMGREPGVFK    | 243 |
| AtTERT   | -----VK-----QAK---QVKRNKNFKFG-LSETY-----                      | 318 |
| Sc_Est2p | QIVGNRCNEPHLPKWAQRSSSSSATAAQIKQLT---EPVTNKQFLHKLNLINSS-----   | 196 |
| AmexTERT | -----EGFSVSFLLNLTLCQCPFGGQ-----RLVENIFLSRGPFEHHPVNKPATTS-KKW  | 528 |
| hTERT    | -----EQLRPSFLLSSLRPSLTGAR-----RLVETIFLGSRPWMPG-----TP-RRL     | 379 |
| mTERT    | -----ERLNPFSLLSNLQPNLTGAR-----RLVEIIFLGSRPRTSG-----PL-CRT     | 384 |
| TmtTERT  | -----ECFPKSFLLNRLKGCQAGGQ-----RLVETIFLSKMLVQKCSENTPSYN-WRK    | 532 |
| PvTERT   | -----ERLPESFILNRLKSFSSGGR-----RLVEVIVLDSKITQPD SINPRSSG-KRK   | 521 |
| xTERT    | -----KGFSESFILNSLDSTPSGSQ-----KLVEIIFLSNFLAEQNF-DQPKRDE-NCR   | 433 |
| ZfTERT   | -----KNFLLNRKLGVGGAARMQGEDLVRMIFLQS---ES-----ND-SKP           | 391 |
| OlaTERT  | -----HGFCLNRKRRTAAGPRLQGQDLVRLVFFEGLPYLNG-----QE-RKP          | 368 |
| TtTERT   | SSFFNYSEIKGFQFKVIEKQLQGRQ-----FINS-----KIKPDHPQTIIK           | 286 |
| AtTERT   | -----SVIPPNHILKTLRPNCSDSK-----LLMNHIFGEVNVWSTTPSHG---KG-NCP   | 363 |
| Sc_Est2p | -----SFFPYSK---ILPSSSSIK--KLTDLREAIPTNLV-----KIP              | 230 |
| AmexTERT | KRLPKRYWP-----MKCVFQELVDNHNKCPYKVLLRNNCPVRLPQVSLESNASL        | 577 |
| hTERT    | PRLPQRYWQ-----MRPLFLELLGNHAQCPYGVLLKTHCPLRAAVTPAAGV---        | 425 |
| mTERT    | HRLSRRYWQ-----MRPLFQQLLVNHAECQYVRLLRSHCRFR---TANQQV---        | 427 |
| TmtTERT  | KRLPRRYWQ-----MRDVFQKLLKNHAKCPYLVLLKKNCPVW---ISETNSSKTDTM     | 581 |
| PvTERT   | RRLPKRYRE-----MRDLFQELLENHSHKCPYLVLRKNCPVW---VSESQKSTEGE      | 570 |
| xTERT    | YKLPKRYWK-----MKPHFQELIQNHKKFPYLVYLNKHCVPRSSMACSEKRSIQ        | 482 |
| ZfTERT   | KKLPKRFFA-----MVPFLSRLLRQHRKCPYRLFQKRCAGNP-----               | 429 |
| OlaTERT  | KKLPRLRYFN-----MVPVFGRLLRQHRKCRYSSVLHRMCPVVELSRA-----         | 410 |
| TtTERT   | KTLLKEYQSKNFSQCEERDLFLEFTEKIVQNFHNINFNYLKKFKCLPENYQSLKSQVKQ   | 346 |
| AtTERT   | SGSICLYHS-----LLKSLKNLIGKTKSSHLKMLLDKHC PVLLQLQEDALKSGTT      | 412 |
| Sc_Est2p | QR---LKIR-----MNLTLQKLLKRHKRLNYSILNSICPPLEGTVLD-----          | 270 |

|          |                                                                  |     |
|----------|------------------------------------------------------------------|-----|
| AmexTERT | EKSV-CG-VP--GPPHVDRGKAPNVQENTDERERSESTTLSGCKMEVAYEFSQVEAKHSS     | 633 |
| hTERT    | CAR-----EKPQGS-----                                              | 434 |
| mTERT    | -----                                                            | 427 |
| TmtTERT  | CQSVSCDGVQIDREAEGQLGKEPPIC-----LTSNGREGGYTAVPNGSCSLSKRTST        | 633 |
| PvTERT   | SD-----KEKDRHKGRSSRS-----RQDTTLENCFRLAPDGLNPFPGTSE-              | 611 |
| xTERT    | KNRIEND-----                                                     | 489 |
| ZfTERT   | -----                                                            | 429 |
| OlaTERT  | -----                                                            | 410 |
| TtTERT   | -----                                                            | 346 |
| AtTERT   | SQSSRRQ--KAD-----KLPHGSSS-----                                   | 430 |
| Sc_Est2p | -----                                                            | 270 |
| AmexTERT | N--TLVSTVTFKEAQSSSQPGKEATAQQFRDSSFMKLLRQYSSLWQVYAFARECLKTVPVK    | 691 |
| hTERT    | -----VAAPEEEDTDPRLVQLLRQHSSPWQVYGVRACLRRLVPP                     | 475 |
| mTERT    | -----TDALNTSPPHLMDLLRLHSSPWQVYGFLRACLCCKVSA                      | 465 |
| TmtTERT  | DLSILSNPEKF--VLGRTENERQNAKDFCDPGLKELLRQHSSHWQVYVVRDECLDLVPA      | 691 |
| PvTERT   | --DSIRKSENA--ELKRKNTEGQISPDSSSSGVMFLKQHSTHWQVYMFVRECIERVPA       | 667 |
| xTERT    | -----GKQLKHFTTKANLLSLLKQHSSIWQVYMFVRECLNNVVPD                    | 529 |
| ZfTERT   | -----DVKDMESSLKSHSSPYRVYLFVRECLRHII PH                           | 461 |
| OlaTERT  | -----AQGELSSLI PQHCAPHRVYLFVRECLTAVVPE                           | 442 |
| TtTERT   | -----IVQSENKANQQSCENLFNSLYDTEISYQITNFLRQIIQNCVPN                 | 390 |
| AtTERT   | -----SQTGPKP---C--PSVEERKLYCTNDQVVSFIWAICRYIVPE                  | 467 |
| Sc_Est2p | -----LSHLRQSPKERVVKFIIVILQKLLPQ                                  | 297 |
| AmexTERT | ELWGSNHNKYRFFKNVKTFFIS-LGKFGKFSLRELMWKMVRVTDCAWLRLGK-----DDHF    | 744 |
| hTERT    | GLWGSRHNERRFLRNTKKFFIS-LGKHAKLSLQELTWKMSVRDCAWLRSP-----GVGC      | 528 |
| mTERT    | SLWGTRHNERRFFKNLKKFFIS-LGKYGKLSLQELMWKMKVEDCHWLRRSP-----GKDR     | 518 |
| TmtTERT  | ELWGS SHNKCRFFKNVKTFFIS-LGKFARFSLQELMWKMVRVNDCTWLRLVIK-----GDHF  | 744 |
| PvTERT   | ALWGS SHNKCRFYKNVKKFFIS-LGKFNVFSLRELMWKMVRVKNCVWLRLNK-----EQGHF  | 721 |
| xTERT    | IMWGS SHNKCRFFRNKVSFLFFSGKFGKISLSELMWSMRVEDCSWIRLQK-----SDHF     | 583 |
| ZfTERT   | ELWGCQENQLHFLSNVNKFL--LGKFERLTLVQLMWRMKVQACHWLGPKK-----R---      | 511 |
| OlaTERT  | ELWGS DHNRLQFFSRVRGFLK--SGKFERISVAELMWKIKVMDCDWLKLRR-----TAGR    | 495 |
| TtTERT   | QLLGKKN--FKVFLEKLYEFVQ--MKRFENQKVLDIICFMDVFDVEWFVDLK-----NQKF    | 442 |
| AtTERT   | SLLGTTQHMRVLRKNIAWFVS--RRNEKCTVNQFLHKVKPSDFPFARKELCCMVNGHEL      | 526 |
| Sc_Est2p | EMFGSKKNKGKIKNLNLLLS--LPLNGYLPFDSLLKKLRLKDFRWLFISDIWFT-----      | 350 |
| AmexTERT | V-PASEHRFREVI FAKFLYWLMDTYVIQLLRSFFYITETMFQKNALFFYRKCIWSKLHKI    | 803 |
| hTERT    | V-PAAEHRLREEILAKFLHWMLSVYVVELLRSFFYVTETTTFQKNRLFFYRKSVWSKLQSI    | 587 |
| mTERT    | V-PAAEHRLRERILATFLFWMMDTYVQLLRSFFYITESTFQKNRLFFYRKSVWSKLQSI      | 577 |
| TmtTERT  | V-PALEHHYREEILAKFLYWLMDTYVIQLLRSFFYITETMFQKNMLFFYRKLIWSKLQNI     | 803 |
| PvTERT   | V-PSSEHRFRQDLMAKFLYWLMDSYVAELLRSFFYITETMFQKNLLFFFRKSIWSKLESI     | 780 |
| xTERT    | V-PASEHLLREKILAKFVFWLMDTYVIQLLKSFFYVTETMFQKHRLFFYRKSVWKKLQNI     | 642 |
| ZfTERT   | Q-CASEHRYREWMLGQCMGWMLSGFVVGLVRAQFYITESMGHKHTLRFYRGDVWSRLQDQ     | 570 |
| OlaTERT  | F-PPSELAYRTRILSQFLTWLLDGFVVGLVRACFYATESVGQKNAIRFYRQEVWSKLQDL     | 554 |
| TtTERT   | TQKRKYISDKRKILGDLIVFIINKIVIPVLRYNFYITEKHKEGSQIFYRKPIWKLVS KL     | 502 |
| AtTERT   | Q-SESIRSTQQMLCTKWISWLFLEIVKKLVHFNFYATESQGGRLNIYYRKRKSWE RLISK    | 585 |
| Sc_Est2p | ---KHNFENLQLAICFISWLFRLQIPKIIQTFYCTEISS--TVTIVYFRHDTWNKLITP      | 406 |
| AmexTERT | GLGKHF----AKVKLRSLSSSRDVAALKQ--NPLISRLRFIPKPNG--LRPIVKVQNVLDVQ   | 856 |
| hTERT    | GIRQHL----KRVQLRELSEA EVRQHREARPALLTSRLRFIPKPDG--LRPIVNDYVVGAR   | 643 |
| mTERT    | GVRQHL----ERVRLRELSQE EVRHHQDTWLAMPICRLRFIPKPNG--LRPIVNSYSMGTR   | 633 |
| TmtTERT  | GMRNHF----AKVHLRALSAEIEIKVQKKCVPMASKLRFIPKPNG--LRPIVKNSVSGAK     | 859 |
| PvTERT   | GIRNHL----AKVHLRVLLKEI EIKTLQOQKCVPLASKLRFIPKPNG--LRPVVKQNGVVGAE | 836 |
| xTERT    | GLRKHL----EKVKLRSLSSDELENMQQWKNVPLVSRLRFIPKTNG--LRPISKISSTLSSQ   | 698 |
| ZfTERT   | AFRAHL----CKGQWRPLSPS QALKVPN---SAVTSRIRFIPKTSS--MRPITRLSGSR---  | 620 |
| OlaTERT  | AFRRII----AKGEMEELSPA QVASLPK---GTVISQLRFIPKTDG--MRPITRVIGAD---  | 604 |
| TtTERT   | TIVKLEENLEKVEEKLI PED-----SFQYPQGLRIIPKKGSS--FRPIMTFLRKDKQK      | 555 |
| AtTERT   | EISKAL----DGYVLVDDAEAE-----SSRKKLSKFRFLPKANG--VRMVLDFSSSSRSQ     | 634 |
| Sc_Est2p | FIVEYF----KTYLVENNVCRNHNS--YTLSNFNHSMKRIIPKKSNEFRIIAIPCRGADE-    | 460 |
| AmexTERT | LHSKEKRDRKMQYFNTQLKNLFGVLNYERTRNPNNLLGAFGFGLDGISKAWRQFVLKV-LE    | 915 |
| hTERT    | TFRRE---KRAERLTSRVKALFSVLNYERARRPGLLGASVLGLDDIHRAWRTFVLRV-RA     | 699 |
| mTERT    | ALGRR---KQAQHFTQRLKTLFMSLNYERTKHPHLMGSSVLGMNDIYRTWRAFLRV-RA      | 689 |
| TmtTERT  | TLNRKSRDKKVHYFNTQLKNLFSVLNYERTNTSLLGSSVFGKDDIYKIWRKFVSEV-LE      | 918 |
| PvTERT   | TFSRKAGEKKIQYFNTQLKNLFSVLNYERIKNPSLLGSSVFGKDDIYAVWKKFVLKV-LK     | 895 |
| xTERT    | -QSKENQEKKIHHS SQIRNLFSVLNYEWNRCSLIGSSVFGMDDIYKKWKKFVLDF-EK      | 756 |
| ZfTERT   | -----DTLQYFQSCVRVLQNVLSVCVREAPGPMGSTVWGWQDIHRRQLQDFSPQQ---       | 669 |
| OlaTERT  | -----SNTRLHHKRIRDLSMLQARVRSAPALLGSTVWGMTDIHKVLRSLAPAQ---         | 653 |
| TtTERT   | N-----IKLNLNQILMDSQLVFRNLKMDLGQKIGYSVFDNKQISEKFAQFIEKW---        | 604 |
| AtTERT   | -----SLRDTHAVLKDIQLKEPDVLGSSVFDHDDFYRNLCYPYLHL-RS                | 677 |
| Sc_Est2p | --EFTIYKENHKNAIQPTQKI--LEYLRNKRPTSFTK-IYSPTQIADRIKEFKQRL LKK     | 516 |

|          |                                                             |                                                 |      |
|----------|-------------------------------------------------------------|-------------------------------------------------|------|
| AmexTERT | SNF <b>KEKQYYFVKTDVTGAYDTIPHAKLIEVVS</b> KILNP              | SD--NYCIRRYAEIWVDPAGH <b>IR</b>                 | 973  |
| hTERT    | -QD <b>PPPELYFVKVDVTGAYDTIQDRLTEVIASII</b> KPQ              | --NTYCVRRYAVVQKAHGH <b>VR</b>                   | 756  |
| mTERT    | -LD <b>QTPRMFYFKADVTGAYDAIPQGKLVEVVANMIR</b> H              | SE-STYCIRQYAVVRRDSQGV <b>VH</b>                 | 747  |
| TmtTERT  | SND <b>KIPRFYYVKADVTGAYDTIPHDKLVEVVSQIL</b> DP              | EKRTVYCIRRYAVIKITMSGQ <b>IR</b>                 | 978  |
| PvTERT   | LNAV <b>LPFRFYFVKADVIGAYDSIPHNLKEVILQAL</b> SP              | DEKTTYSIIRRYAVIIRTRNGL <b>IR</b>                | 955  |
| xTERT    | PQV <b>EKLQFYFVKTDVKGAYDTIPHSKLDEVISKVIN</b> P              | NANEVYCIRRYATVSVDPTRG <b>II</b>                 | 816  |
| ZfTERT   | -KS <b>SPRPLYFVKVDVSGAYDSLPHLKLVEVLKEVL</b> GP              | FAEQSFFLRQYSSVWSDPTRG <b>LR</b>                 | 728  |
| OlaTERT  | -KD <b>KPQPLYFVKVDVSGAYDSLPHDKLKEVITEAL</b> SP              | VQEEVFTVRHYAKIWADSHEG <b>LK</b>                 | 712  |
| TtTERT   | KNK <b>GRPQLYYVTLDIKKCYDSIDQMKLNNFFNQSD</b> LI              | --QDITYFINKYLLFQRNKRPL <b>LQ</b>                | 662  |
| AtTERT   | QSG <b>ELPPLYFVVADVFKAFDSVDQGKLLHVIQSF</b> LKD              | E---YILNRCRLVCCGK--- <b>R</b>                   | 729  |
| Sc_Est2p | FNN <b>ALPELYFMKFDVKSCYDSIPRMECMRILKDAL</b> KN              | EN--GFFVRSQY-FFNTNTGVL-                         | 572  |
| AmexTERT | <b>KSYKRHVATM</b> ---DDF----- <b>LPNTKMFVS</b> -----        | <b>HLQON</b> -----                              | 1000 |
| hTERT    | <b>KAFKSHVSTL</b> ---TDL----- <b>QPYMRQFVA</b> -----        | <b>HLQET</b> -----                              | 783  |
| mTERT    | <b>KSFERRQVTTL</b> ---SDL----- <b>QPYMGQFLK</b> -----       | <b>HLQSDA</b> -----                             | 776  |
| TmtTERT  | <b>KYYRRHVSTF</b> ---KDF----- <b>MSHMLRFVS</b> -----        | <b>HLQES</b> -----                              | 1005 |
| PvTERT   | <b>RYYRRHVSTY</b> ---KEF----- <b>ISDMKEFIN</b> -----        | <b>HLQEV</b> -----                              | 982  |
| xTERT    | <b>KSEKRVHSEL</b> ---ADV----- <b>LPNMKQFVS</b> -----        | <b>NQQEK</b> -----                              | 843  |
| ZfTERT   | <b>KRFCTKAEMS</b> ---E----- <b>PLNMKGFFV</b> -----          | <b>DEQVS</b> -----                              | 753  |
| OlaTERT  | <b>KAFARQVDFS</b> ---DGSM----- <b>GSTSMKGFVM</b> -----      | <b>SLQKS</b> -----                              | 741  |
| TtTERT   | <b>IQQTNNLNSAMEIEEEKINKKPFKMDNINFPY</b> YFN                 | LKERQIAYSLEYDDDD <b>QILQKGFK</b> EI             | 722  |
| AtTERT   | <b>SNWVNKILVS</b> ---SDK----- <b>NSNFSRFTS</b> -----        | <b>TVPIN</b> -----                              | 756  |
| Sc_Est2p | <b>KLFNVVN</b> ---A---SRV----- <b>P</b> -----               |                                                 | 584  |
| AmexTERT | - <b>GSLKHAILVEQALHLNENSRLNQFFQOMITNN</b> ILK               | VGDKCFVQCRGIPQGSILSTV <b>LC</b>                 | 1059 |
| hTERT    | - <b>SPLRDAVVIEQSSSLNEASSGLFDVFLRFMCH</b> HAV               | RIRGKSYVQCQGIPQGSILST <b>LLC</b>                | 842  |
| mTERT    | - <b>SALRNSVVEIQSISMNESSSLFDFFLHLRHS</b> VVK                | IGDRCYTQCQGIPQGSILST <b>LLC</b>                 | 835  |
| TmtTERT  | - <b>TSLQNAIVVEQSLSLNETSSSLFAFFLQMIH</b> NNI                | LEIEGRYYLQCCGIPQGSILST <b>LLC</b>               | 1064 |
| PvTERT   | - <b>TSLRNAVVEQSVSLKESNTSLAEFFLKFQI</b> ONS                 | ILKIKDRYYVQRCGIPQGSILST <b>LLC</b>              | 1041 |
| xTERT    | - <b>NLLRNTILVEQNLLNNESSVKLLAVFQQIIR</b> SHI                | LRIKDRYYMQCCGIPQGSMLST <b>ILC</b>               | 902  |
| ZfTERT   | - <b>GRLHDAILVER-HSSEVRGDDVFQFFQKMLC</b> SYV                | IHRDQOMFRQVCGIPQGSVSS <b>LLC</b>                | 811  |
| OlaTERT  | - <b>SKVHHAVLVEQAFGSNLRGKDALQFFTQML</b> TGS                 | VVQHGGKTYRQCRGIPQGSVSS <b>LLC</b>               | 800  |
| TtTERT   | <b>QSDDRPFIVINQDKPRCITKDIHNNHLKHIS</b> QYN                  | VISFNKVKFRQKRGIPQGLNIS <b>GVLC</b>              | 782  |
| AtTERT   | --- <b>ALQSI</b> VVDKGENHRVRKKDLMWVIGN <b>MLK</b> NN        | <b>MLQLDKSFYVQIAGIPQGHRLSS</b> LLC              | 813  |
| Sc_Est2p | --- <b>KPYELYIDNVRTVHLSNQDVINVMEIIF</b> K                   | TALWVEDKCYIRE <b>DGLFQGS</b> SLSA <b>PIV</b>    | 641  |
| AmexTERT | <b>SLCYGDMENNFSGI</b> Q-----                                | QDGV <b>FMRLIDDFLLVTPYLDKAE</b>                 | 1098 |
| hTERT    | <b>SLCYGDMENKLFAGI</b> R-----                               | RDGL <b>LLRLVDDFLLVTPHLLTHAK</b>                | 881  |
| mTERT    | <b>SLCFGDMENKLF</b> AEVQ-----                               | RDGL <b>LLRFVDDFLLVTPHLDQAK</b>                 | 874  |
| TmtTERT  | <b>SLCYGDMENKLF</b> CGIQ-----                               | RDGV <b>LIRLIDDFLLLTPHLLTAK</b>                 | 1103 |
| PvTERT   | <b>NLCYGDMENKLLQ</b> GVQ-----                               | KDGV <b>LMRLTDDFLLVTPHLLTQAK</b>                | 1080 |
| xTERT    | <b>SLCYGDMENAM</b> LGGIQ-----                               | KNGV <b>LMRLIDDFLLVTPHLDQAK</b>                 | 941  |
| ZfTERT   | <b>NLCYGHMEKAL</b> LKDIA-----                               | KGGC <b>LMRLIDDFLLITPHLLSKAT</b>                | 850  |
| OlaTERT  | <b>CLCYGHMENVL</b> FRDIK-----                               | NKGC <b>LMRLVDDFLLITPDRNQAQ</b>                 | 839  |
| TtTERT   | <b>SFYFGKLEEEYTQ</b> FLKN-----                              | AEQVNGSIN <b>LMRLTDDYLFISDSQQNAL</b>            | 828  |
| AtTERT   | <b>CFYYGHLERTLI</b> YPFLEEASKDVSSKECSREEELI                 | IPTSYK <b>LLRFIDDYLFVSTSRDQAS</b>               | 873  |
| Sc_Est2p | <b>DLVYDDLLEF-Y</b> SEFKA-----                              | SPSQDTL <b>ILKLADDFLIISTDRQQVI</b>              | 683  |
| AmexTERT | <b>TFLRTLAEGIPQY</b> GCSISLSKTMVNFPLT-DLPGCS                | QAEQL---PAR <b>SVF</b> PWC <b>GVLF</b> DTQ      | 1154 |
| hTERT    | <b>TFLRTLVRGVPEY</b> GCVVNLRKTVVNFPEDEALG                   | TAFVQM---PA <b>HGLF</b> PWC <b>GLLD</b> TR      | 938  |
| mTERT    | <b>TFLSTLVHGVPEY</b> GCMINLQKTVVNFPEPGTLG                   | GAAPYQL---PA <b>HCLF</b> PWC <b>GLLD</b> DTQ    | 931  |
| TmtTERT  | <b>TFLRTLATGIPEY</b> GFLINPKKTMNFHVEDEDI                    | PGCSKFKQL---PY <b>CGVI</b> PWC <b>GLLD</b> IQ   | 1160 |
| PvTERT   | <b>MFLRTLAMGVPEY</b> GFVINPAKTVVNFPIDEDI                    | PGCSEFKQL---PA <b>HGVI</b> PWC <b>GLLD</b> DTQ  | 1137 |
| xTERT    | <b>TFLRTLAEGIPQY</b> GCSIS <b>PQKTVVNF</b> PVD-DI           | PECSEVEQL---PS <b>HCLFRWC</b> GLL <b>LD</b> DTQ | 997  |
| ZfTERT   | <b>EFLTLLSGVPDYG</b> CQIN <b>PQK</b> VAVNF <b>PVCVS</b> -W  | VNSGVSVL---PS <b>SCLF</b> PWC <b>GGLMI</b> HTR  | 906  |
| OlaTERT  | <b>SFLSILLAGVPQY</b> GVVAN <b>PQKVVVNF</b> QSGEGG           | AFPDIRVL---PP <b>HCLF</b> PWC <b>GLLD</b> DMR   | 896  |
| TtTERT   | <b>NLIVQLQNCANN</b> NGFMFNDQKITTNFQFPQED                    | YNLEHFKIS---V <b>QNECQWIGKSI</b> DMN            | 884  |
| AtTERT   | <b>SFYHRLKHGFKD</b> YNCFMNETKFCINFEDKEEH-RC                 | SSNRMFVGDN <b>GVFVRWTGLLI</b> NSR               | 932  |
| Sc_Est2p | <b>NIKKLAMGGFQK</b> YNAKANRD <b>KILA</b> VSSQS-----         | DD <b>DTVIQFCAMHI</b> FVK                       | 728  |
| AmexTERT | <b>TLEVYCDYSRYACT</b> SIRSSLTISHKAETG-TSMR                  | HKLIRVLKLCKSIFLDLMVNS <b>LR</b> TV              | 1213 |
| hTERT    | <b>TLEVQSDYSSYART</b> SIRASLT <b>FN</b> RGFKAG-RN           | MRRKLFVGLRLKCHSLF <b>LDLQVNSLQ</b> TV           | 997  |
| mTERT    | <b>TLEVFCDYSGYAQ</b> TSIKTSL <b>TQ</b> SVF <b>KAG</b> -K    | TMRNKLLSVLR <b>LKCHGLF</b> LDLQVNS <b>LQ</b> TV | 990  |
| TmtTERT  | <b>TLEVYCDYSSYACT</b> SIRSSLA <b>FN</b> SSNTAG-KN           | MKYKLVTVLKLCHSL <b>FLNLQVNSL</b> RTV            | 1219 |
| PvTERT   | <b>TLEVYCDYSSYACT</b> SIRSSLS <b>FN</b> SSSTKAG-V           | LRNKLAVLQ <b>LKCHSLF</b> VDLQ <b>INSLR</b> TV   | 1196 |
| xTERT    | <b>TLDVYYDYSSYACT</b> SIRSSMT <b>FC</b> HSSAAG-KY           | MKQKLIRVLRLKCHSL <b>FLDLKVN</b> SLRTV           | 1056 |
| ZfTERT   | <b>TLDVYKDYSRYDGL</b> SLRYS <b>LT</b> LSA <b>HS</b> PS-TVM- | KKLLSVLSIKSTDIFLDLRLNS <b>VEAV</b>              | 964  |
| OlaTERT  | <b>SLDVCKDYSSYAG</b> LSLRYS <b>LT</b> LSA <b>HS</b> AG-Q    | MMRRLMSILRIK <b>CHPLFLDLK</b> TNS <b>LES</b> A  | 955  |
| TtTERT   | <b>TLEIKSIQKQ-TQ</b> QEI <b>NT</b> INVAISIKNLKSQ            | LKNKLS-LFLNQ <b>LIDYFNP</b> NINS <b>FEGL</b>    | 942  |
| AtTERT   | <b>TFEVQVDYTRYLS</b> GHIS <b>ST</b> FSVAWQ <b>NK</b> PV-R   | NLRQKLCYFLVPK <b>CHPILFDS</b> NSIN <b>SEI</b> V | 991  |
| Sc_Est2p | <b>ELEVWKHSSTMN</b> NFHIRSKSS-----                          | KGIFRSLIALFN <b>TRISYKTID</b> TNLNSTNTV         | 779  |

|          |                                                               |      |
|----------|---------------------------------------------------------------|------|
| AmexTERT | FINIYKIFLLQAYRFHACVIQL---PFN-----QGVRK-NPSFFLSVISDMAPCCYS     | 1261 |
| hTERT    | CTNIYKILLQAYRFHACVLQL---PFH-----QQVWK-NPTFFLRVISDTASLCYS      | 1045 |
| mTERT    | CINIYKIFLLQAYRFHACVIQL---PFD-----QRVRK-NLTFFLGISSQASCCYA      | 1038 |
| TmtTERT  | FINIYKIFLLQAYRFHACVLQL---PFN-----QQVRK-NPCFFLRISDTASCCYS      | 1267 |
| PvTERT   | CINIYKILLQAYRFHACVLQL---PFN-----QKIKS-NPREFFLKIISDTASCCFS     | 1244 |
| xTERT    | CINTYKIFLLQAYRFHACVVQL---PFG-----QRVMN-NPPFFLTVISDMAPCFYT     | 1104 |
| ZfTERT   | YRSLYKLILLQALRFHACVRSL---PLG-----QSVNR-NPSFFLKMIWRMTRVTNK     | 1012 |
| OlaTERT  | YKNIHKLVLQACRFHVCVQSL---PFA-----QTVAK-NPTYFQQMIWDMAHYANA      | 1003 |
| TtTERT   | CRQLYHHSKATVMKFYPFMTKLFQIDLKSKSQYSVQYGKENTNENFLKDILYYTVEDVCK  | 1002 |
| AtTERT   | RLNIYQIFLLAAMKFHCYVYEV---SRF-----WKL---HPQTLFKFITISVRYMFR     | 1037 |
| Sc_Est2p | LMQIDHVVKNISECYKSAFKDL---SIN-----VTQNMQFHSFLQRIEMTVSGCP-      | 827  |
|          |                                                               |      |
| AmexTERT | ILKSKNIGIALGTKD-ACNTFPFEAAQWLSYHAFIVKLTCHKA---VYKCLLKPLQNCVK  | 1317 |
| hTERT    | ILKAKNAGMSLGAGK-AAGPLPSEAVQWLCHQAFLLKLTRHRV---TYVPLLGSRLTAQT  | 1101 |
| mTERT    | ILKVKNPGMTLKAS---GSFPPEAAHWLCYQAFLLKLAHSV---IYKCLLGPLRTAQK    | 1091 |
| TmtTERT  | ILKTKNTGIALGTKG-ASGLFPSEAAEWLCYHAFI IKLTNHKV---VYKCLLRFLKICEL | 1323 |
| PvTERT   | VLKTKNKDVSFTSTG-TSVVLTYEYVQWLTYHAFVIKLTNHKV---IYKCLLAPLKHCKK  | 1300 |
| xTERT    | TFKAKNKDLTRGYKD-VSCQFNFEAVQWLSYQAFLLKLHNHKV---LYKCLIGPLQNCMK  | 1160 |
| ZfTERT   | LLTHINKGLPVCSD-SGGVLQSEAVQLLFCCLAFETLFRFRS---VYHCLIPALHKRKR   | 1068 |
| OlaTERT  | LIRRSNTGLVLGDGA-QKGSVQYEAVELLFCLAFRLVLSKHP---VYKDLLPRLHKWKR   | 1059 |
| TtTERT   | ILCYLQFEDEINSNI---KEIFKNLYSWIMWDIIVSYLKKKKQFKGYLNKLLQKIRKSRF  | 1059 |
| AtTERT   | LINRRVRRINTGSSFRPVLKLYKEEVIWGLDAYIQVLKKKNS---RYRMLLIYLSALS    | 1094 |
| Sc_Est2p | -----IT---KCDPLIEYVRFTILNGFLESLSNNTS---KFKDNIILLRKEIQ         | 870  |
|          |                                                               |      |
| AmexTERT | Q-----LSKKIHK-----ATIKMLNDVIEPS-----LHKDFAAILN-----           | 1348 |
| hTERT    | Q-----LSRKLPG-----TTLTALEAAANPA-----LPSEDFKTILD-----          | 1132 |
| mTERT    | L-----LCRKLPE-----ATMTILKAAADPA-----LSTDFQTILD-----           | 1122 |
| TmtTERT  | Q-----LFKKIPK-----ATMQLLKTVTEPA-----LCKDFKAIMD-----           | 1354 |
| PvTERT   | R-----LLRQIPE-----TTVQFLKEVTEPS-----LYEDFKAILD-----           | 1331 |
| xTERT    | Q-----LSRRLSQ-----DTIELLSVTDSS-----LHKDFSCIMD-----            | 1191 |
| ZfTERT   | A-----LQRELCG-----ITLARVRQASSPR-----IPLDFSMRV-----            | 1098 |
| OlaTERT  | R-----LERLLGD-----LRLARVRQAANPR-----ALLDFLAMQM-----           | 1090 |
| TtTERT   | FYLKEGCKSLQLILSQQKYQLNKKELEAIEFIDLNN-----LIQDIKTLPKISAKSNQQ   | 1114 |
| AtTERT   | K-----HSLSQQQLSS-----ELRYATDRSNSSSLWKLNLY-----                | 1123 |
| Sc_Est2p | H-----LQAYIYI-----YI-----                                     | 880  |
|          |                                                               |      |
| AmexTERT | ---                                                           | 1348 |
| hTERT    | ---                                                           | 1132 |
| mTERT    | ---                                                           | 1122 |
| TmtTERT  | ---                                                           | 1354 |
| PvTERT   | ---                                                           | 1331 |
| xTERT    | ---                                                           | 1191 |
| ZfTERT   | ---                                                           | 1098 |
| OlaTERT  | ---                                                           | 1090 |
| TtTERT   | NTN                                                           | 1117 |
| AtTERT   | ---                                                           | 1123 |
| Sc_Est2p | ---                                                           | 880  |

**Figure S1.** Multiple Sequence Alignment (MSA) of TERT proteins of representative species: AmexTERT, *Ambystoma mexicanum*; hTERT, *Homo sapiens*; mTERT, *Mus musculus*; TmtTERT, *Terrapene mexicana triunguis*; PvTERT, *Pogona vitticeps*; xTERT, *Xenopus laevis*; ZfTERT, *Danio rerio*; OlaTERT, *Oryzias latipes*; Sc\_Est2p, *Saccharomyces cerevisiae*; TtTERT, *Tetrahymena thermophila*; AtTERT, *Arabidopsis thaliana*; HIV-1 RT.
