# Supplementary material for: An Identification and Characterization of the Axolotl (Ambystoma mexicanum, Amex) Telomerase Reverse Transcriptase (Amex TERT)
Source: Genes (Basel). 2022 Feb 18;13(2):373. doi: 10.3390/genes13020373 (PMC8924892; doi:10.3390/genes13020373)
Supplement: Supplementary file 1 [file genes-13-00373-s001.zip]

Archive with 6 entries (5 files):
- genes-1577429 - supplementary/
- genes-1577429 - supplementary/Figure S1.pdf
- genes-1577429 - supplementary/Figure S2.pdf
- genes-1577429 - supplementary/Figure S3.pdf
- genes-1577429 - supplementary/Table S1.pdf
- genes-1577429 - supplementary/Table S2.pdf
